# Supplementary material for: Secondary organic aerosol formation from the β-pinene+NO 3 system: effect of humidity and peroxy radical fate
Source: Copernicus journal article supplement (doi:10.5194/acp-15-7497-2015), 2015-07-10
Supplement: Supplementary file 1 [file acp-15-7497-2015-supplement.pdf]

Supplement of Atmos. Chem. Phys., 15, 7497–7522, 2015  
<http://www.atmos-chem-phys.net/15/7497/2015/>  
doi:10.5194/acp-15-7497-2015-supplement  
© Author(s) 2015. CC Attribution 3.0 License.

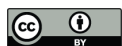

*Supplement of*

## **Secondary organic aerosol formation from the $\beta$ -pinene+NO<sub>3</sub> system: effect of humidity and peroxy radical fate**

**C. M. Boyd et al.**

*Correspondence to:* N. L. Ng (ng@chbe.gatech.edu)

The copyright of individual parts of the supplement might differ from the CC-BY 3.0 licence.

## 20 Formaldehyde needed for dry “RO<sub>2</sub>+HO<sub>2</sub> dominant” Experiments

21 Formaldehyde is added to the chamber in order to enhance the RO<sub>2</sub>+HO<sub>2</sub> chemistry. Without  
22 formaldehyde injection, simulation results based on the Master Chemical Mechanism (Equations  
23 are given at the end of Supplement) show that RO<sub>2</sub>+RO<sub>2</sub> would be the dominant fate. However,  
24 once sufficient formaldehyde is added to the chamber experiments, we determine that the  
25 RO<sub>2</sub>+HO<sub>2</sub> pathway is substantially greater than the RO<sub>2</sub>+RO<sub>2</sub> pathway.

26  
27 To determine the concentration of formaldehyde needed to favor the RO<sub>2</sub>+HO<sub>2</sub> channel  
28 significantly over the RO<sub>2</sub>+RO<sub>2</sub> channel, a comparison of relative reaction rates is required.  
29 Specifically, in order to favor a branching ratio of RO<sub>2</sub>+HO<sub>2</sub> to RO<sub>2</sub>+RO<sub>2</sub> by 95% (19:1), it is  
30 necessary that

$$31 \quad k_{RO_2+HO_2}[HO_2][RO_2] = 19k_{RO_2+RO_2}[RO_2][RO_2] \quad (SR1)$$

$$32 \quad k_{RO_2+HO_2}[HO_2] = 19k_{RO_2+RO_2}[RO_2] \quad (SR2)$$

$$33 \quad k_{RO_2+HO_2} \frac{d[HO_2]}{dt} = 19k_{RO_2+RO_2} \frac{d[RO_2]}{dt} \quad (SR3)$$

34  
35 Rates of production for each radical can then be used as a surrogate for the approximate  
36 concentrations as the radicals are expected to be consumed immediately upon production. The  
37 rates of production are:

$$38 \quad \frac{d[HO_2]}{dt} = k_{HCHO+NO_3}[HCHO][NO_3] \quad (SR4)$$

$$39 \quad \frac{d[RO_2]}{dt} = k_{\beta pin+NO_3}[\beta pin][NO_3] \quad (SR5)$$

40  
41 Thus equation SR3 becomes:

$$42 \quad k_{RO_2+HO_2}k_{HCHO+NO_3}[HCHO][NO_3] = \quad (SR6)$$
$$43 \quad 19k_{RO_2+RO_2}k_{\beta pin+NO_3}[\beta pin][NO_3]$$

$$44 \quad k_{RO_2+HO_2}k_{HCHO+NO_3}[HCHO] = 19k_{RO_2+RO_2}k_{\beta pin+NO_3}[\beta pin] \quad (SR7)$$

49 Therefore, the ratio of formaldehyde to  $\beta$ -pinene should be ( $k_{RO_2+RO_2} = 9.2E-14 \text{ cm}^3 \text{ molecules}^{-1}$   
50  $\text{s}^{-1}$ ;  $k_{\beta pin+NO_3} = 2.5E-12 \text{ cm}^3 \text{ molecules}^{-1} \text{ s}^{-1}$ ;  $k_{RO_2+HO_2} = 9.2E-14 \text{ cm}^3 \text{ molecules}^{-1} \text{ s}^{-1}$ ;  $k_{HCHO+NO_3} =$   
51  $5.5E-16 \text{ cm}^3 \text{ molecules}^{-1} \text{ s}^{-1}$ , all rate constants are from MCM v3.2 (Saunders et al., 2003)):

52

$$53 \quad \frac{[HCHO]}{[\beta pin]} = \frac{19k_{RO_2+RO_2}k_{\beta pin+NO_3}}{k_{RO_2+HO_2}k_{HCHO+NO_3}} = 350 \quad (SR8)$$

54

### 55 **Results from Filter Sample Analysis**

56 The UHPLC-MS total ion chromatogram for a typical “ $RO_2+NO_3$  dominant” experiment under  
57 dry conditions is displayed in Fig. S5, which also represents the features observed in all other  
58 experiments under dry and humid conditions. Excluding the solvent peak at  $\sim 0.2$  min and  
59 discarding the presence of any relevant species in the controls, the chromatogram in Fig. S5  
60 reveals peaks with retention times of 3.26, 3.28, 6.19, 6.27, 7.03, and 7.08 min. These peaks are  
61 displayed in the extracted ion chromatograms (EIC) for species with  $m/z$  489, 244, 473, 489, 505  
62 and 522.

63

64 The collisional induced dissociation (CID) of the peak at  $\sim 3.26$  min is displayed in Fig. S6 for  
65 the interval 30-70 V. Clearly, two anions with  $m/z$  244 and 489 are observed at 3.26 min under  
66 low fragmentation voltage (30 and 40 V). The prominent peak  $m/z$  290 is mainly due the  
67 presence of an adduct of the parent peak with formic acid:  $[M-H] + HCOOH = 244 + 46 = 290$ .  
68 Support for the previous observation is also based on the appearance of the adduct  $[M-H] +$   
69  $CH_3COOH = 244 + 60 = 304$  in the presence of acetic acid, instead of formic acid, in the mobile  
70 phase. The ion observed at  $m/z$  197 becomes more intense at higher fragmentation voltage before  
71 starting to break apart above 60 V. The parent peak  $m/z$  244 must undergo the concerted loss of  
72 nitrous acid,  $HNO_2$ , to produce  $m/z$  197. The loss of  $HNO_2$  explains the change from an even to  
73 an odd mass, which may be facilitated by intramolecular hydrogen transfer from the hydroxyl  
74 group to the leaving  $-NO_2$  moiety, leaving a carboxylate group as a rearranged fragment. The  
75 confirmation of the presence of a  $-COOH$  group in the neutral molecule with molecular mass  
76 245 amu arises from the decarboxylative loss of 44 amu from the fragment ion  $m/z$  197 that  
77 generates a new fragment at  $m/z$  153.

78

79 The MS peak at  $m/z$  489 in Fig. S6 does not show the formation of either a formic acid or an  
80 acetic acid adduct. In addition, the lack of a constant ratio for the ion count of species at  $m/z$  244  
81 and 489 in all experiments suggests that different formation pathways result in both products.  
82 The careful analysis of the data presented showing the formation of formate or acetate adducts  
83 for the species at  $m/z$  244, and its excellent ionization at very low fragmentation voltage suggest  
84 that the co-eluting species at  $m/z$  489 should be a carboxylic acid molecule in the mechanistic  
85 scheme (Fig. S7) to be presented below.

86  
87 The chromatographic peak eluting at 6.19 min in Fig. S5 displayed as an EIC for  $m/z$  505 with  
88 broad features corresponds to a species with molecular weight (MW) of 506 amu. Given the  
89 nitrogen rule, this species with even MW must contain an even number of nitrogen atoms. The  
90 combination of two  $\beta$ -pinene molecules, which have incorporated nitrate radicals, provides a  
91 starting mass of 396 amu for this species. The mass difference (506 – 396) amu = 110 amu  
92 eliminates the possibility of including a third  $\beta$ -pinene molecule or two more nitrate radicals in  
93 this product. Therefore, a general formula of  $C_{20}H_{30}N_2O_{13}$  is assigned to this species. The ring  
94 and double bond equivalency (RDB) defines the number of unsaturated bonds in the compound:

$$RDB = 1 + \frac{\sum_i^{i_{max}} N_i(V_i - 2)}{2} \quad (SR17)$$

95  
96  
97  
98 where  $i_{max}$  is the total number of different elements in the molecular formula,  $N_i$  is the number of  
99 atoms of element  $i$ , and  $V_i$  is the valence of atom  $i$  (Pavia et al., 2008). For  $C_{20}H_{30}N_2O_{13}$ , RDB =  
100 7 from limiting the calculated formulas that make sense chemically, a -C=O group should be  
101 included in the structures of the mechanism forming species with this MW. Similarly, the EIC  
102 for  $m/z$  522 shows a broad peak that could correspond to a less polar isomer species eluting at  
103 6.27 min. A molecular structure with two  $\beta$ -pinene units and an odd number of nitrogen atoms is  
104 assigned to be  $C_{20}H_{33}N_3O_{13}$  (MW = 523 amu) with RDB = 6 in the mechanism presented below.

105  
106 Remarkably, a second species with  $m/z$  489 elutes at 7.09 min in the EIC of Fig. S5, which  
107 possesses a carbonyl group absorbing with  $\lambda_{max} = 275$  nm in the UV-visible spectrum. This  
108 molecule elutes later in the chromatogram, in the region of species with lower polarity –without  
109 a -COOH group– because it corresponds to a less polar structural isomer than that eluting at 3.26

110 min. The most likely general formula for this species is  $C_{20}H_{30}N_2O_{12}$  (MW = 490) with RDB = 7,  
111 shown as the non-carboxylic acid structure in the mechanism introduced in the next section. A  
112 slightly lighter species with  $m/z$  473 (MW = 474 amu) and retention time of 7.03 min also  
113 contains a carbonyl group in the UV-visible spectrum. The even molecular weight of this  
114 molecule indicates a species with an even number of nitrogen atoms. The similar retention times  
115 between both species ( $m/z$  474 and 490) and the mass difference of only 16 amu suggests a  
116 common molecular structure that differs by one oxygen atom. The molecular formula  
117  $C_{20}H_{33}N_2O_{11}$  (MW = 474 amu) is represented by the proposed structures displayed in Fig. S7.

118  
119 Figure S7 shows the further oxidation of some of the products shown in Fig. 8 of the main text.  
120 Panel A of Fig. S7 shows the hydroxycarbonyl nitrate product with MW = 229 amu can be  
121 further oxidized to the peroxy radical **V** by hydrogen abstraction from  $C_4$  (R27) and subsequent  
122 reaction with oxygen (R28). Hydrogen abstraction from the dihydroxycarbonyl nitrate generated  
123 from **V** by R29 occurs preferentially on a  $-CH_3$  group ( $C_9$  or  $C_{10}$ ) by R30, proceeding through an  
124 alkyl radical with true trigonal pyramidal geometry, an unfavorable intermediate for  $C_5$ ,  $C_7$ , and  
125  $C_8$  due to the geometric constraints imposed by the cyclobutane ring (Vereecken and Peeters,  
126 2012). Less likely is the abstraction occurring at  $C_4$ , due to both the hindrance created by the  
127 alcohol substituent and the slight strain from the adjacent butane ring. Addition of  $O_2$  is also  
128 included in R30 (Atkinson and Arey, 2003), resulting in a peroxy radical **W**. Reaction R31 for  
129  $W + L'$  produces an alcohol ( $R^{31}OH$ ) which can undergo a second H-abstraction by step 1 of  
130 R32 at the same carbon,  $C_{10}$ .  $C_{10}$  is slightly more electropositive than  $C_9$  due to the hydroxyl  
131 substituent, and abstraction of the only H remaining at the more hindered  $C_4$  of **W** is less likely  
132 to occur than at  $C_{10}$ . Step 2 of R32 shows the formation of a peroxy radical **Y** through  
133 combination with molecular oxygen (Atkinson and Arey, 2003). Panel B shows the oxidation of  
134 the hydroxynitrate acid product,  $R^{20}COOH$ , through hydrogen abstraction and reaction with  
135 molecular oxygen in R33 to peroxy radical **X**. Panel C shows in reaction R34 how a second  
136 nitrate radical can add to the newly generated double bond of the hydroxynitrate product of R7  
137 (Fig. 8, main text). The nitrate radical adds to the less substituted  $C_7$ , leaving a relatively stable  
138 tertiary alkyl radical on  $C_2$ , which combines with  $O_2$  via reaction R35 to form a peroxy radical **Z**.

139

140 Figure S8 shows how intermediates presented in Fig. 8 of the main text, **S**, **T**, and **U** combine  
141 with radicals **V**, **W**, **X**, **Y**, **Z** presented in Fig. S7 to produce the heavier MW products observed  
142 in aerosol filter extracts by UHPLC-MS via  $\text{RO}_2+\text{RO}_2$  reactions. It is noted that each product in  
143 Fig. S8 may be formed from the combination of other intermediates not explicitly drawn in Fig.  
144 8 in the main text and Fig. S7. These findings are in agreement with previous work showing the  
145 formation of organic peroxides during the oxidation of terpenes (Ng et al., 2008; Venkatachari  
146 and Hopke, 2008; Docherty et al., 2005). Figure S8 shows that the major heavy MW species in  
147 the UHPLC chromatogram of Fig. S5 can be generated from the same early oxidation  
148 intermediates **S**, **T**, and **U**, implying the possible existence of more than one isomer for each  
149 mass. The later observation is consistent with the EIC in Fig. S5 showing broad peaks in the  
150 UHPLC-MS for  $m/z$  505, 522, and the later 489, and a clear shoulder for  $m/z$  473.

151

### 152 **Model Calculations for “ $\text{RO}_2+\text{NO}_3$ dominant” Experiments**

153 To ensure that the reaction conditions are favorable for the  $\text{RO}_2+\text{NO}_3$  reaction, a simple chemical  
154 model is developed using the Master Chemical Mechanism (MCM v3.2) as a basis (Saunders et  
155 al., 2003). Reactions and their rate constants are shown in Table S1. The  $\text{RO}_2$  fate in a typical  
156 “ $\text{RO}_2+\text{NO}_3$  dominant” experiment (Experiment 5 in Table 1 of the main text) is shown in Fig.  
157 S10.

158

159

160

161

162

163

164

165

166

167

168

169

170

171 **Reference**

172 Atkinson, R., and Arey, J.: Gas-phase Tropospheric Chemistry of Biogenic Volatile Organic  
173 Compounds: A Review, *Atmos. Environ.*, 37, 197-219, 2003.

174  
175 Docherty, K. S., Wu, W., Lim, Y. B., and Ziemann, P. J.: Contributions of Organic Peroxides to  
176 Secondary Aerosol Formed from Reactions of Monoterpenes with O<sub>3</sub>, *Environ. Sci. Technol.*,  
177 39, 4049-4059, 2005.

178  
179 Neuman, J. A., Nowak, J. B., Huey, L. G., Burkholder, J. B., Dibb, J. E., Holloway, J. S., Liao,  
180 J., Peischl, J., Roberts, J. M., Ryerson, T. B., Scheuer, E., Stark, H., Stickel, R. E., Tanner, D. J.,  
181 and Weinheimer, A.: Bromine measurements in ozone depleted air over the Arctic Ocean,  
182 *Atmos. Chem. Phys.*, 10, 6503-6514, 10.5194/acp-10-6503-2010, 2010.

183  
184 Ng, N. L., Kwan, A. J., Surratt, J. D., Chan, A. W. H., Chhabra, P. S., Sorooshian, A., Pye, H. O.  
185 T., Crounse, J. D., Wennberg, P. O., and Flagan, R. C.: Secondary Organic Aerosol (SOA)  
186 Formation from Reaction of Isoprene with Nitrate Radicals (NO<sub>3</sub>), *Atmos. Chem. Phys.*, 8, 4117-  
187 4140, 2008.

188  
189 Odum, J. R., Hoffmann, T., Bowman, F., Collins, D., Flagan, R. C., and Seinfeld, J. H.:  
190 Gas/Particle Partitioning and Secondary Organic Aerosol Yields, *Environ. Sci. Technol.*, 30,  
191 2580-2585, 10.1021/es850943+, 1996.

192  
193 Pavia, D., Lampman, G., Kriz, G., and Vyvyan, J.: Introduction to spectroscopy, Cengage  
194 Learning, 2008.

195  
196 Sander, S. P., Abbatt, J., Barker, J. R., Burkholder, J. B., Friedl, R. R., Golden, D. M., Huie, R.  
197 E., Kolb, C. E., Kurylo, M. J., Moortgat, G. K., Orkin, V. L., and Wine, P. H.: Chemical kinetics  
198 and photochemical data for use in atmospheric studies: Evaluation Number 17, Jet Propulsion  
199 Laboratory, 2011.

200  
201 Saunders, S. M., Jenkin, M. E., Derwent, R. G., and Pilling, M. J.: Protocol for the development  
202 of the Master Chemical Mechanism, MCM v3 (Part A): tropospheric degradation of non-  
203 aromatic volatile organic compounds, *Atmos. Chem. Phys.*, 3, 161-180, 2003.

204  
205 Venkatachari, P., and Hopke, P. K.: Characterization of Products formed in the Reaction of  
206 Ozone with  $\alpha$ -pinene: Case for Organic Peroxides, *J. Environ. Monitor.*, 10, 966-974, 2008.

207  
208 Vereecken, L., and Peeters, J.: A Theoretical Study of the OH-initiated Gas-phase Oxidation  
209 Mechanism of  $\beta$ -pinene (C<sub>10</sub>H<sub>16</sub>): First Generation Products, *Phys. Chem. Chem. Phys.*, 14,  
210 3802-3815, 10.1039/C2CP23711C, 2012.

211

212

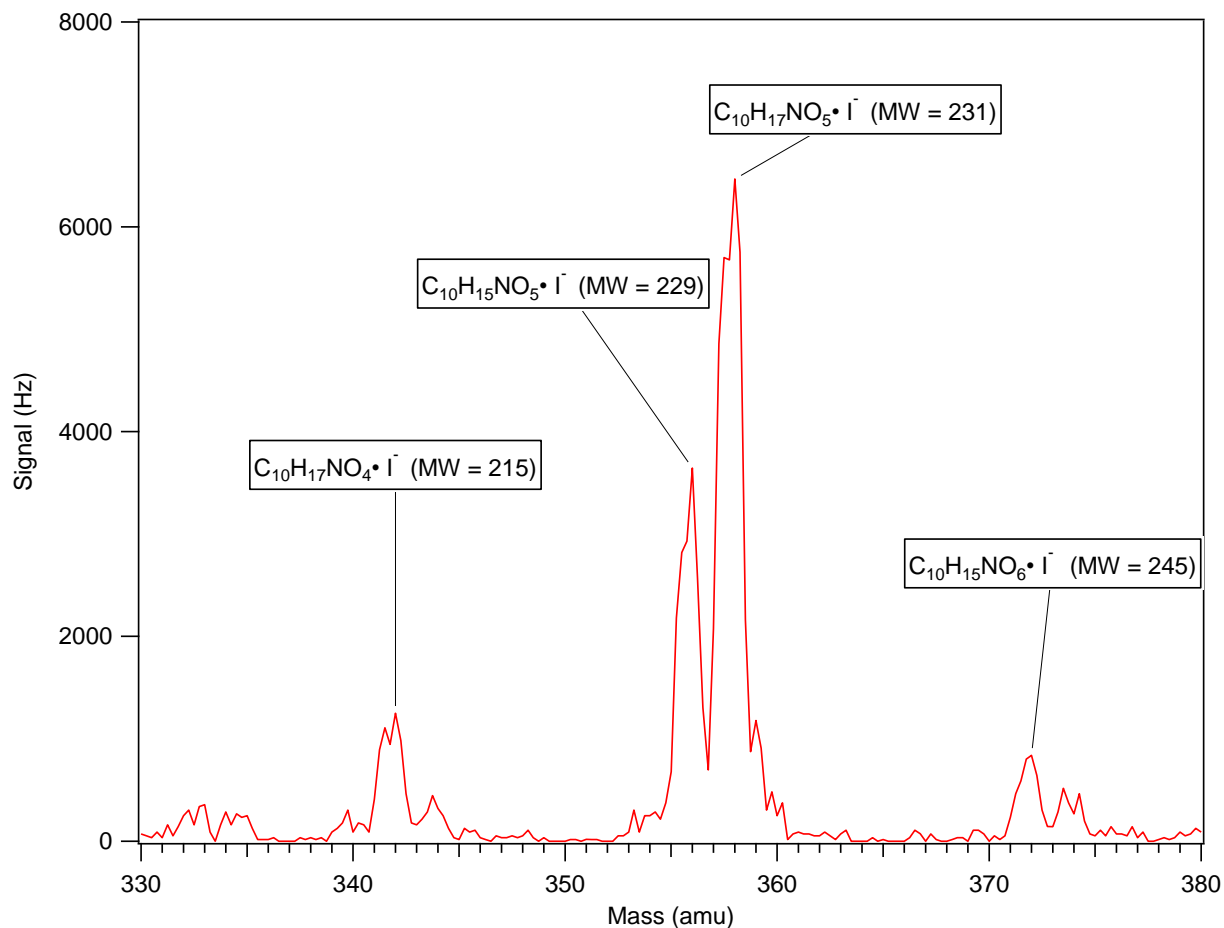

213

214

215 **Figure S1:** Chemical Ionization Mass Spectrometry (CIMS) spectra for a typical “ $RO_2+HO_2$   
 216 dominant” experiment under dry conditions showing the major gas-phase compounds from the  $\beta$ -  
 217 pinene+ $NO_3$  reaction. The measured species are proposed to be organic nitrates due to their odd  
 218 molecular weights. The specific molecular formulas for the ions shown are inferred from the  
 219 chemical mechanism (Fig. 8, main text).

220

221

222

223

224

225

226



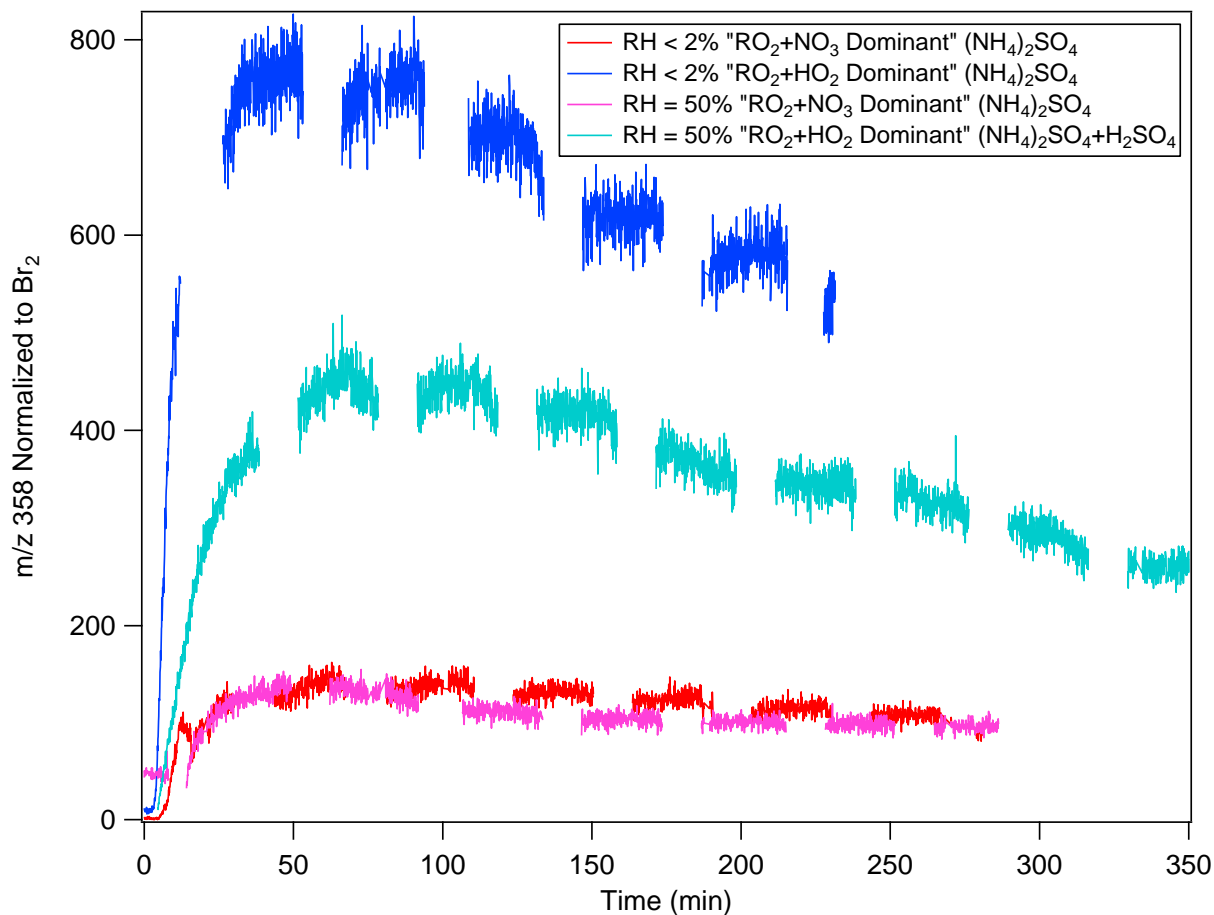

227

228

229 **Figure S2:** CIMS time series for  $m/z$  358 for the  $\beta$ -pinene+NO<sub>3</sub> reaction at all conditions.  $m/z$   
 230 358 corresponds to a molecule-iodide adduct where the molecule has a molecular weight of 231  
 231 amu. The signal is normalized to the instrument sensitivity to Br<sub>2</sub> to account for any sensitivity  
 232 changes in the CIMS (Neuman et al., 2010). The species at  $m/z$  358 is proposed to be either from  
 233 a hydroperoxide (ROOH) or a dihydroxynitrate. It is significantly higher in experiments where  
 234 RO<sub>2</sub>+HO<sub>2</sub> is the dominant reaction pathway. Gaps in the data are from periodic measurements of  
 235 the CIMS background. It is noted that the data shown above have not been corrected for CIMS  
 236 background.

237

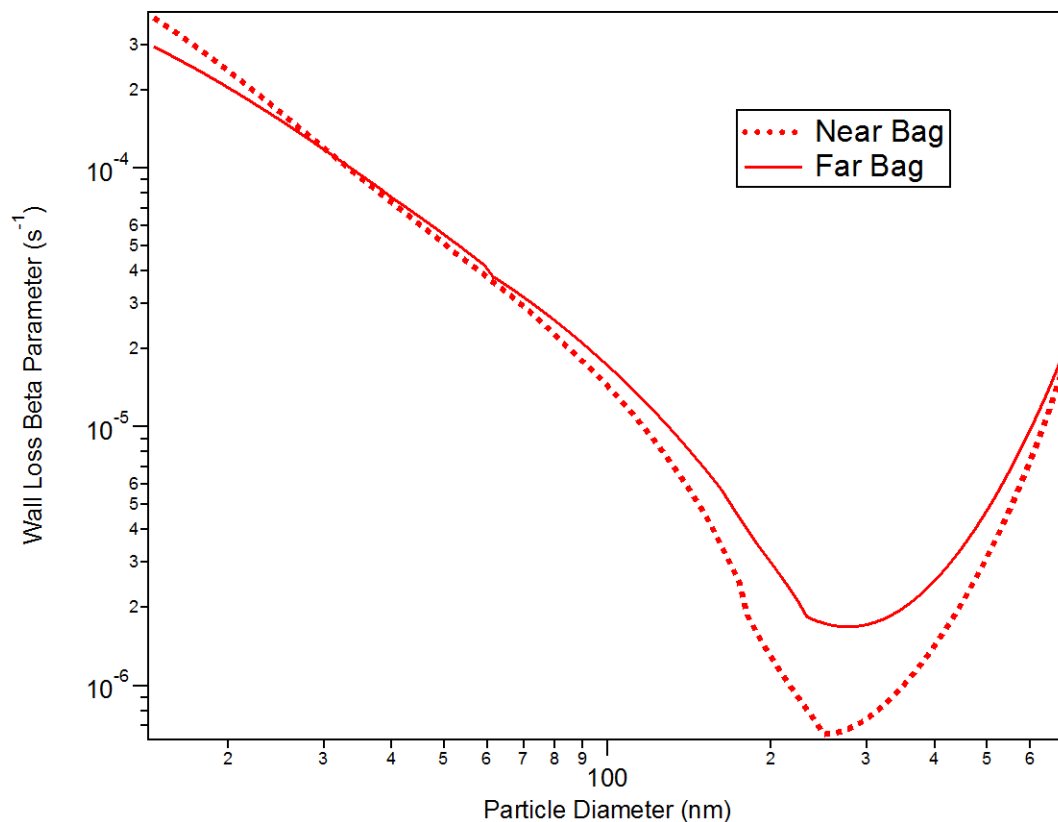

238  
 239 **Figure S3:** Size-dependent particle wall loss rates,  $\beta$ , calculated for both chambers at GTEC.  
 240 Wall loss rates are determined by wall loss experiments performed using ammonium sulfate seed  
 241 particles atomized from an 8 mM solution and measuring their decay over time. The first-order  
 242 decay coefficients were measured for each particle bin over the course of each wall-loss  
 243 experiment.

244  
 245

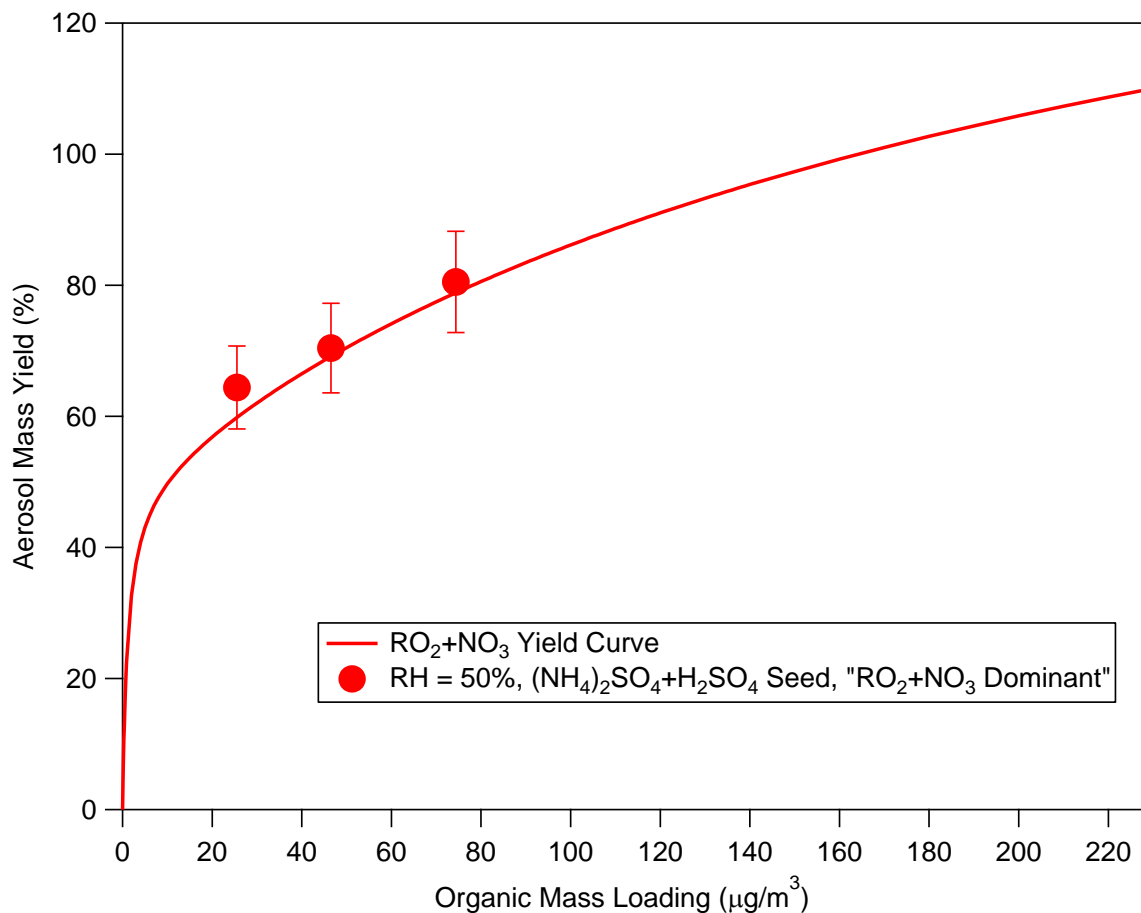

246

247

248 **Figure S4:** The yields for the experiments using  $(\text{NH}_4)_2\text{SO}_4+\text{H}_2\text{SO}_4$  seed (circles) reported  
 249 alongside the yields for the experiments using  $(\text{NH}_4)_2\text{SO}_4$  seed (red curve) in “ $\text{RO}_2+\text{NO}_3$   
 250 dominant” experiments. As seen in this figure, results from the experiments with  
 251  $(\text{NH}_4)_2\text{SO}_4+\text{H}_2\text{SO}_4$  seed are in agreement with the yield curve generated by the two-product  
 252 model (Odum et al., 1996) for experiments conducted in the presence of  $(\text{NH}_4)_2\text{SO}_4$  seed.

253

254

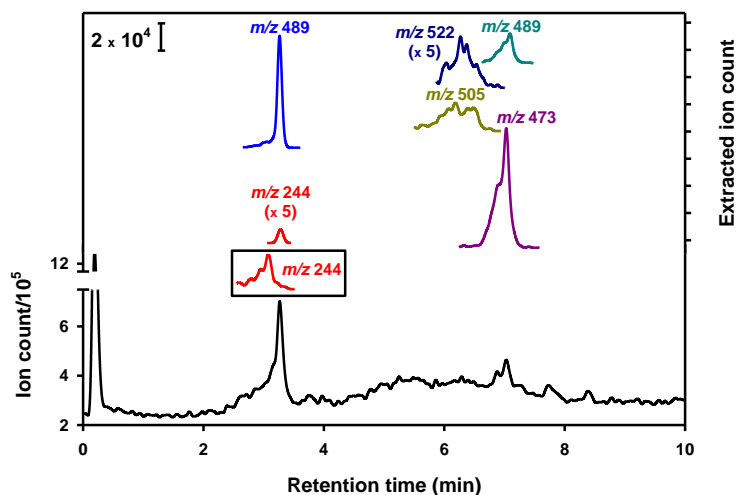

255  
 256  
 257 **Figure S5:** Total (bottom panel and left axis) and extracted (top panel and right axis) ion  
 258 chromatogram (EIC) for eluting peaks at *m/z* 244, 489, 505, 522, and 473, and 489 in the  
 259 UHPLC-MS chromatogram of a “RO<sub>2</sub>+NO<sub>3</sub> dominant” experiment under dry conditions, in the  
 260 presence of 0.1 mM HCOOH (fragmentor voltage = 50 v). The box shows the EIC for *m/z* 244  
 261 using 0.4 mM CH<sub>3</sub>COOH instead of HCOOH (fragmentor voltage = 30 v).

262  
 263  
 264  
 265  
 266  
 267  
 268  
 269  
 270  
 271  
 272  
 273  
 274  
 275  
 276  
 277

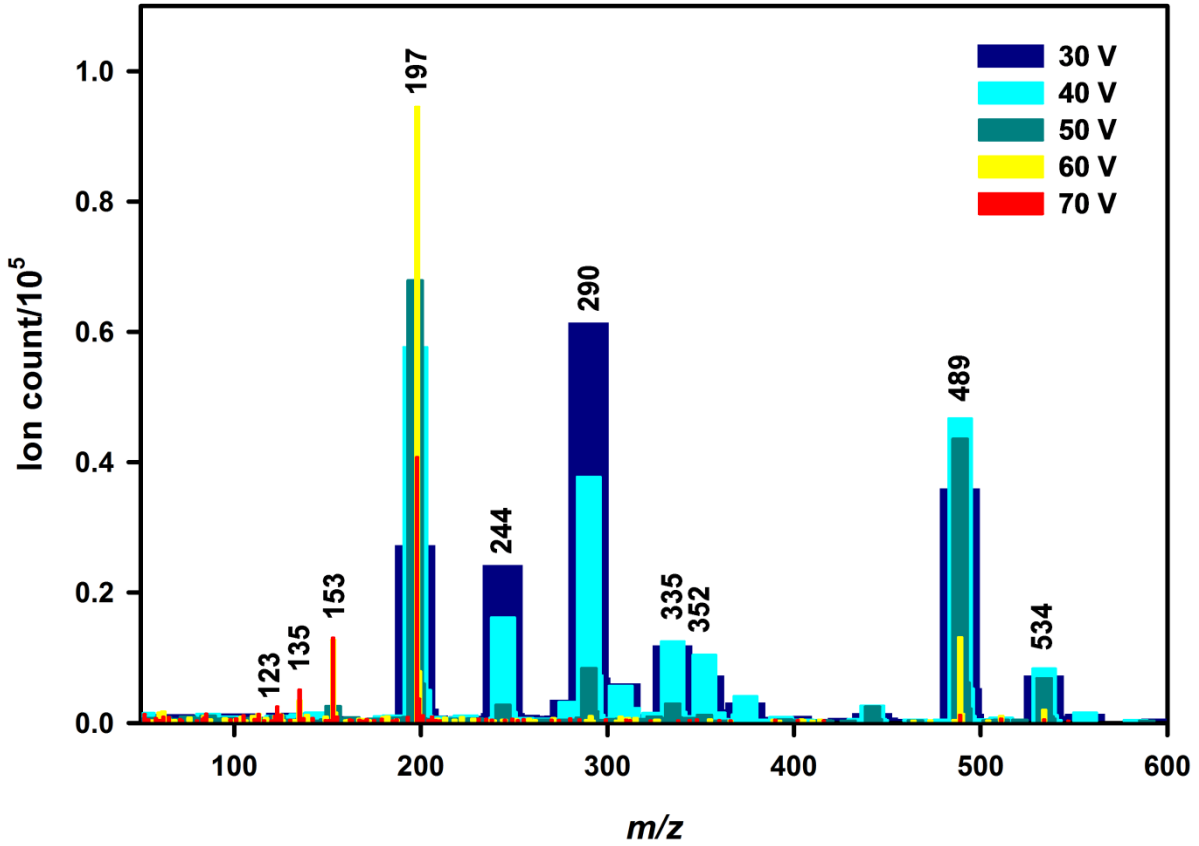

278  
 279 **Figure S6:** Collisional induced dissociation mass spectra of chromatographic peak in Fig. S5 at  
 280  $3.27 \pm 0.03$  min between 30 and 70 V.

281  
 282  
 283  
 284  
 285  
 286  
 287  
 288  
 289  
 290  
 291

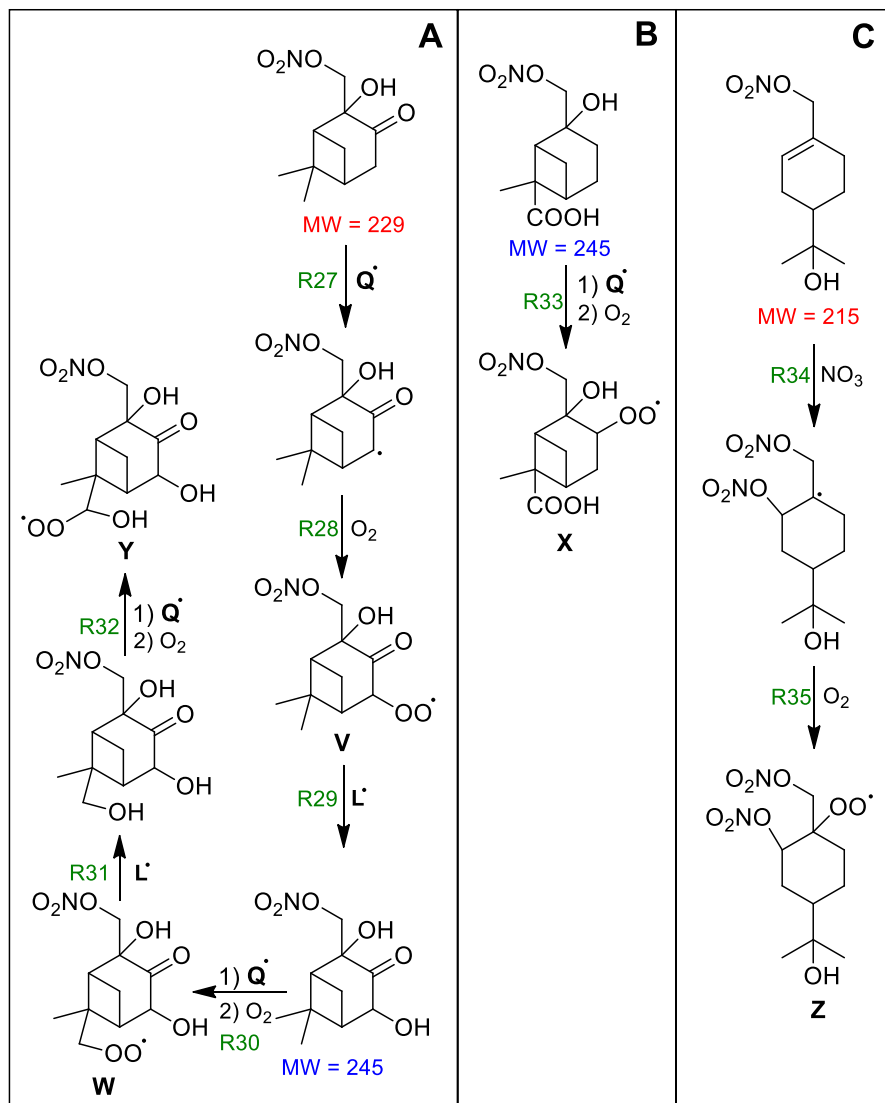

292

293

294 **Figure S7:** Proposed pathways for the further oxidation of products proposed in Fig. 8 of the  
 295 main text. Named radicals are proposed to react to form the higher molecular weight species in  
 296 Fig. S8.

297

298

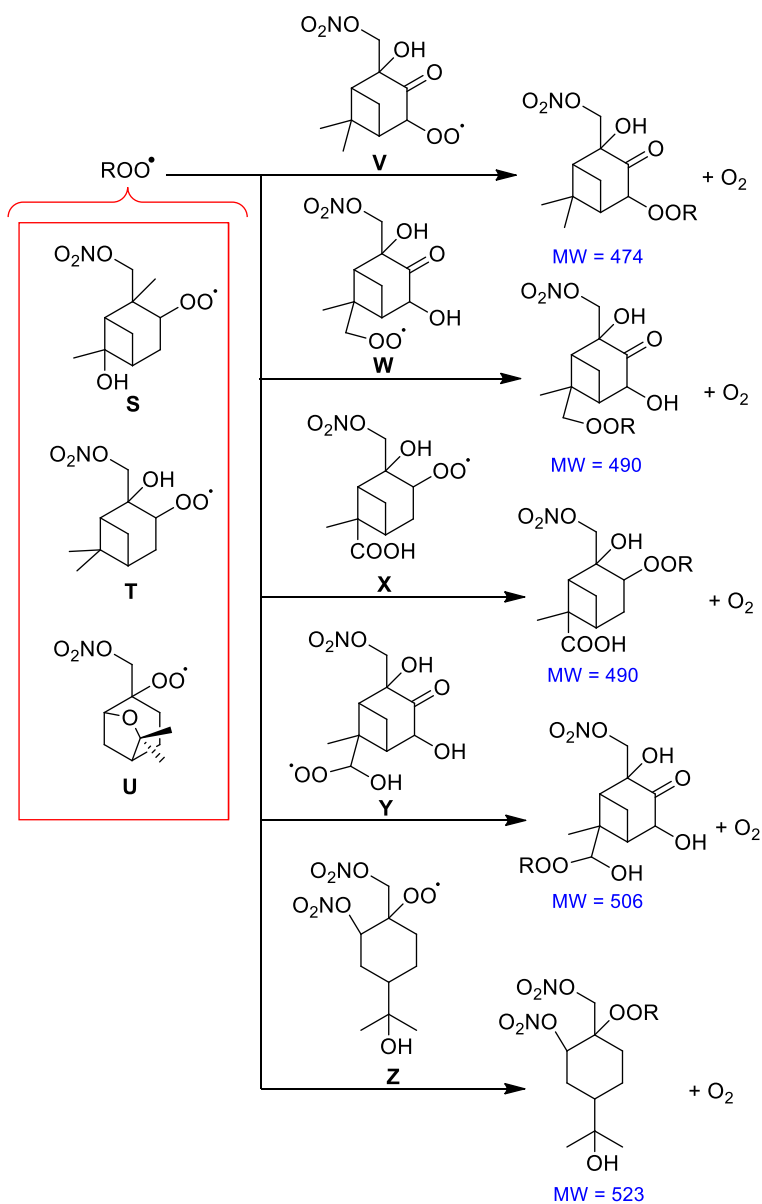

299  
 300  
 301  
 302  
 303  
 304  
 305  
 306  
 307  
 308

**Figure S8:** Proposed pathways for the production of organic peroxides from radicals **S**, **T**, and **U** (Fig. 8, main text) by reaction with radicals **V**, **W**, **X**, **Y**, and **Z** (Fig. S7, Supplement).

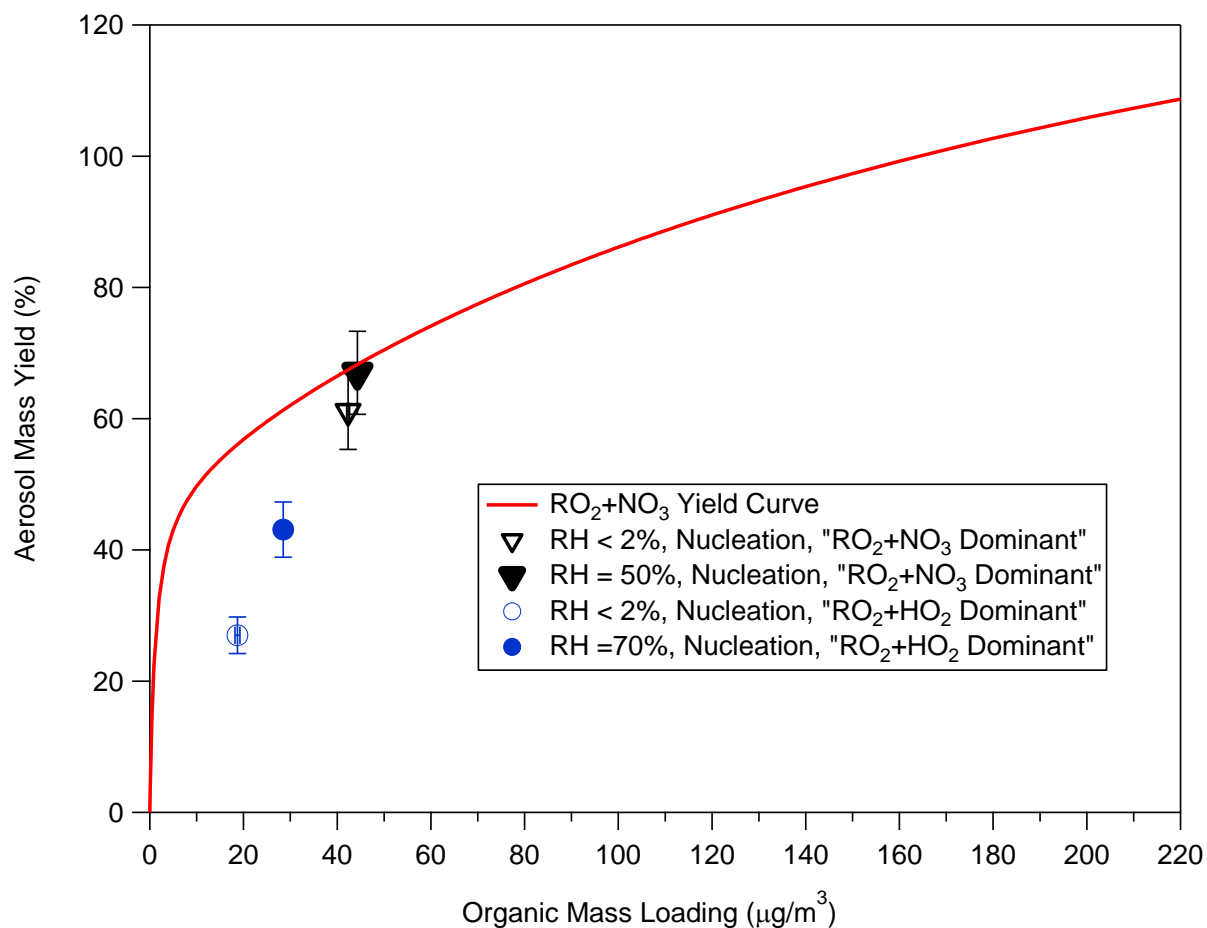

309  
 310 **Figure S9:** The yields for nucleation experiments for all conditions are reported alongside the  
 311 yields for experiments with (NH<sub>4</sub>)<sub>2</sub>SO<sub>4</sub> seed. The yields from the nucleation and seeded  
 312 experiments in the “RO<sub>2</sub>+NO<sub>3</sub> dominant” experiments are in agreement with each other while  
 313 the “RO<sub>2</sub>+HO<sub>2</sub> dominant” experiments are significantly lower than under seeded conditions. The  
 314 y-axis error bars represent uncertainty in yield calculated by an 8% uncertainty in chamber  
 315 volume, 5% uncertainty in hydrocarbon injection, and one standard deviation of the aerosol  
 316 volume measured by SMPS at peak growth.

317  
 318  
 319  
 320  
 321  
 322  
 323



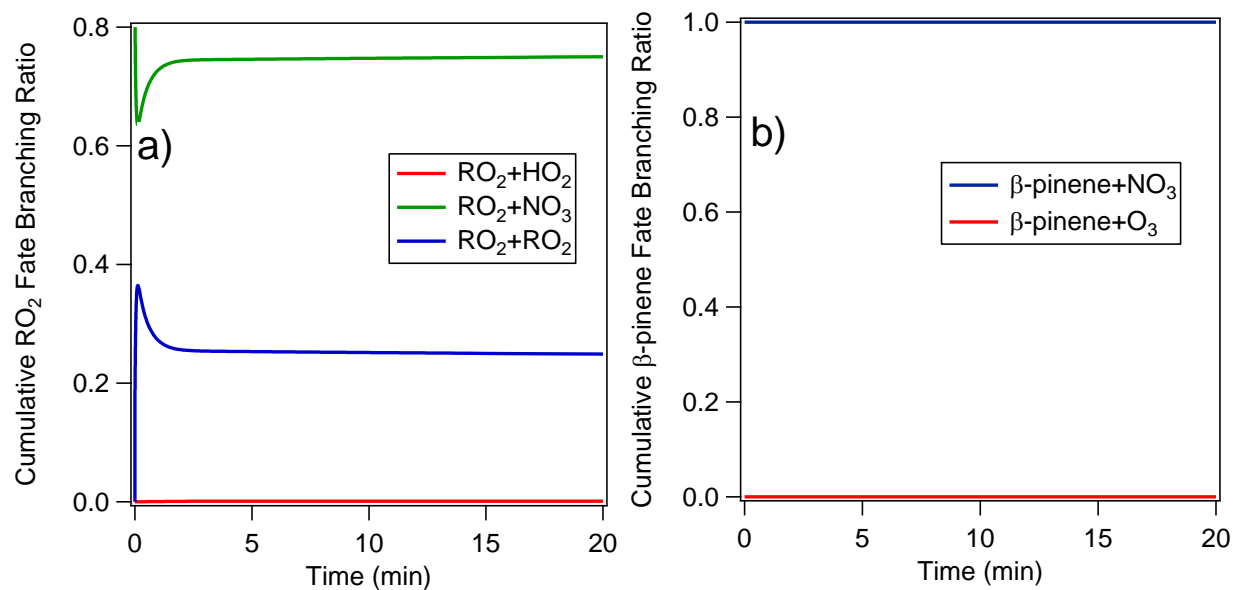

324  
 325 **Figure S10:** a) The RO<sub>2</sub> branching ratio and b)  $\beta$ -pinene fate for a typical “RO<sub>2</sub>+NO<sub>3</sub> dominant”  
 326 experiment (Experiment 5 in Table 1 of the main text). The branching ratios are determined from  
 327 the reactions in the Master Chemical Mechanism (MCM v 3.2). The plots show the cumulative  
 328 amount of products formed from each possible reaction.

329  
 330  
 331  
 332  
 333  
 334  
 335  
 336  
 337  
 338

339 **Table S1:** List of reactions and their rate constants for the  $\beta$ -pinene+NO<sub>3</sub> system. Reactions are  
 340 adapted from MCMv3.2 (Saunders et al., 2003)<sup>a</sup>.

| <b>Reaction:</b>                                                                   | <b>Rate Constant:</b>                                                 |
|------------------------------------------------------------------------------------|-----------------------------------------------------------------------|
| NO <sub>2</sub> + O <sub>3</sub> → NO <sub>3</sub> + O <sub>2</sub>                | 3.2·10 <sup>-17</sup> cc molecules <sup>-1</sup> s <sup>-1b</sup>     |
| NO <sub>2</sub> + NO <sub>3</sub> → N <sub>2</sub> O <sub>5</sub>                  | 6.7·10 <sup>-12</sup> cc molecules <sup>-1</sup> s <sup>-1b</sup>     |
| N <sub>2</sub> O <sub>5</sub> → NO <sub>2</sub> + NO <sub>3</sub>                  | 2.2·10 <sup>-1</sup> s <sup>-1b</sup>                                 |
| OH + O <sub>3</sub> → HO <sub>2</sub> + O <sub>2</sub>                             | 7.3·10 <sup>-14</sup> cc molecules <sup>-1</sup> s <sup>-1b</sup>     |
| OH + HO <sub>2</sub> → H <sub>2</sub> O <sub>2</sub> + O <sub>2</sub>              | 1.1·10 <sup>-10</sup> cc molecules <sup>-1</sup> s <sup>-1b</sup>     |
| HO <sub>2</sub> + O <sub>3</sub> → OH + 2O <sub>2</sub>                            | 1.9·10 <sup>-15</sup> cc molecules <sup>-1</sup> s <sup>-1b</sup>     |
| HO <sub>2</sub> + HO <sub>2</sub> → H <sub>2</sub> O <sub>2</sub> + O <sub>2</sub> | 1.4·10 <sup>-12</sup> cc molecules <sup>-1</sup> s <sup>-1b</sup>     |
| NO + HO <sub>2</sub> → NO <sub>2</sub> + OH                                        | 8.1·10 <sup>-12</sup> cc molecules <sup>-1</sup> s <sup>-1b</sup>     |
| NO + O <sub>3</sub> → O <sub>2</sub> + NO <sub>2</sub>                             | 1.9·10 <sup>-14</sup> cc molecules <sup>-1</sup> s <sup>-1b</sup>     |
| NO + NO <sub>3</sub> → 2 NO <sub>2</sub>                                           | 2.6·10 <sup>-11</sup> cc molecules <sup>-1</sup> s <sup>-1b</sup>     |
| HCHO + NO <sub>3</sub> → HNO <sub>3</sub> + CO + HO <sub>2</sub>                   | 5.5·10 <sup>-16</sup> cc molecules <sup>-1</sup> s <sup>-1</sup>      |
| $\beta$ -pinene + NO <sub>3</sub> + O <sub>2</sub> → NBPINAO2                      | 0.8·2.51·10 <sup>-12</sup> cc molecules <sup>-1</sup> s <sup>-1</sup> |
| $\beta$ -pinene + NO <sub>3</sub> + O <sub>2</sub> → NBPINBO2                      | 0.2·2.51·10 <sup>-12</sup> cc molecules <sup>-1</sup> s <sup>-1</sup> |
| $\beta$ -pinene + O <sub>3</sub> + O <sub>2</sub> → NOPINONE + CH200F              | 0.4·1.5·10 <sup>-17</sup> cc molecules <sup>-1</sup> s <sup>-1</sup>  |
| $\beta$ -pinene + O <sub>3</sub> + O <sub>2</sub> → NOPINOOA + HCHO                | 0.6·1.5·10 <sup>-17</sup> cc molecules <sup>-1</sup> s <sup>-1</sup>  |
| NBPINAO2 + HO <sub>2</sub> → NBPINAOOH                                             | 2.09·10 <sup>-11</sup> cc molecules <sup>-1</sup> s <sup>-1</sup>     |
| NBPINAO2 + NO → NBPINAO                                                            | 9.04·10 <sup>-12</sup> cc molecules <sup>-1</sup> s <sup>-1</sup>     |
| NBPINAO2 + NO <sub>3</sub> → NBPINAO                                               | 2.3·10 <sup>-12</sup> cc molecules <sup>-1</sup> s <sup>-1</sup>      |
| NBPINAO2 + RO <sub>2</sub> → NBPINAO                                               | 0.7·9.2·10 <sup>-14</sup> cc molecules <sup>-1</sup> s <sup>-1</sup>  |
| NBPINAO → NOPINONE + HCHO + NO <sub>2</sub>                                        | 10 <sup>6</sup> s <sup>-1</sup>                                       |
| NBPINAO2 + RO <sub>2</sub> → BPINBNO3                                              | 0.3·9.2·10 <sup>-14</sup> cc molecules <sup>-1</sup> s <sup>-1</sup>  |
| NBPINBO2 + HO <sub>2</sub> → NBPINBOOH                                             | 2.09·10 <sup>-11</sup> cc molecules <sup>-1</sup> s <sup>-1</sup>     |
| NBPINBO2 + NO → NBPINBO                                                            | 9.04·10 <sup>-12</sup> cc molecules <sup>-1</sup> s <sup>-1</sup>     |
| NBPINBO2 + NO <sub>3</sub> → NBPINBO                                               | 2.3·10 <sup>-12</sup> cc molecules <sup>-1</sup> s <sup>-1</sup>      |
| NBPINBO2 + RO <sub>2</sub> → NBPINBO                                               | 0.6·2·10 <sup>-12</sup> cc molecules <sup>-1</sup> s <sup>-1</sup>    |
| NBPINAO → NOPINONE + HCHO + NO <sub>2</sub>                                        | 7·10 <sup>3</sup> s <sup>-1</sup>                                     |
| NBPINAO2 + RO <sub>2</sub> → BPINANNO3                                             | 0.2·2·10 <sup>-12</sup> cc molecules <sup>-1</sup> s <sup>-1</sup>    |

|                                                                |                                                                        |
|----------------------------------------------------------------|------------------------------------------------------------------------|
| NBPINAO2 + RO <sub>2</sub> → NC91CHO                           | 0.6·2·10 <sup>-12</sup> cc molecules <sup>-1</sup> s <sup>-1</sup>     |
| NC91CHO + NO <sub>3</sub> → NC91CO3                            | 2.32·10 <sup>-14</sup> cc molecules <sup>-1</sup> s <sup>-1</sup>      |
| NC91CO3 + HO <sub>2</sub> → NC91CO3H                           | 0.56·1.39·10 <sup>-11</sup> cc molecules <sup>-1</sup> s <sup>-1</sup> |
| NC91CO3 + HO <sub>2</sub> → NOPINONE + NO3 + OH + HCHO         | 0.44·1.39·10 <sup>-11</sup> cc molecules <sup>-1</sup> s <sup>-1</sup> |
| NC91CO3 + NO → NOPINONE + HCHO + 2NO <sub>2</sub>              | 1.98·10 <sup>-11</sup> cc molecules <sup>-1</sup> s <sup>-1</sup>      |
| NC91CO3 + NO <sub>2</sub> → NC91PAN                            | 9.4·10 <sup>-12</sup> cc molecules <sup>-1</sup> s <sup>-1</sup>       |
| NC91PAN → NC91CO3 + NO <sub>2</sub>                            | 3.0·10 <sup>-4</sup> s <sup>-1</sup>                                   |
| NC91CO3 + NO <sub>3</sub> → NOPINONE + HCHO + 2NO <sub>2</sub> | 4.0·10 <sup>-12</sup> cc molecules <sup>-1</sup> s <sup>-1</sup>       |
| NC91CO3 + RO <sub>2</sub> → NOPINONE+ HCHO + NO <sub>2</sub>   | 10 <sup>-11</sup> cc molecules <sup>-1</sup> s <sup>-1</sup>           |
| CH2OOFA → CH2OO                                                | 0.37·10 <sup>6</sup> s <sup>-1</sup>                                   |
| CH2OOFA → CO                                                   | 0.5·10 <sup>6</sup> s <sup>-1</sup>                                    |
| CH2OOFA → HO <sub>2</sub> + CO + OH                            | 0.13·10 <sup>6</sup> s <sup>-1</sup>                                   |
| CH2OO + CO → HCHO                                              | 1.2·10 <sup>-15</sup> cc molecules <sup>-1</sup> s <sup>-1</sup>       |
| CH2OO + NO → HCHO                                              | 1.0·10 <sup>-14</sup> cc molecules <sup>-1</sup> s <sup>-1</sup>       |
| CH2OO + NO <sub>2</sub> → HCHO                                 | 1.0·10 <sup>-15</sup> cc molecules <sup>-1</sup> s <sup>-1</sup>       |
| CH2OO + H <sub>2</sub> O → HCHO                                | 6.0·10 <sup>-18</sup> cc molecules <sup>-1</sup> s <sup>-1</sup>       |
| CH2OO + H <sub>2</sub> O → HCOOH                               | 1.0·10 <sup>-17</sup> cc molecules <sup>-1</sup> s <sup>-1</sup>       |

341 <sup>a</sup>Unless otherwise noted, all reaction rates are from MCM v. 3.2

342 <sup>b</sup>Reaction rates are from Sander et al. (2011) and the references therein

343
